# Supplementary material for: Sequencing RNA from old, dried specimens reveals past viromes and properties of long-surviving RNA
Source: PubMed Central journal article supplement — bioRxiv. 2024 Oct 24:2024.10.03.616531. Preprint. [Version 2] doi: 10.1101/2024.10.03.616531 (PMC11526869; doi:10.1101/2024.10.03.616531), 2024-10-24
Supplement: media-1.pdf [file media-1.pdf]

1 ***Viral metagenomics of 100-year-old museum specimens highlights the long-term stability***  
2 ***of RNA***

3 Alexandra H. Keene<sup>1,2</sup> and Mark D. Stenglein<sup>1</sup> \*

4 **Supplemental Figures**

5

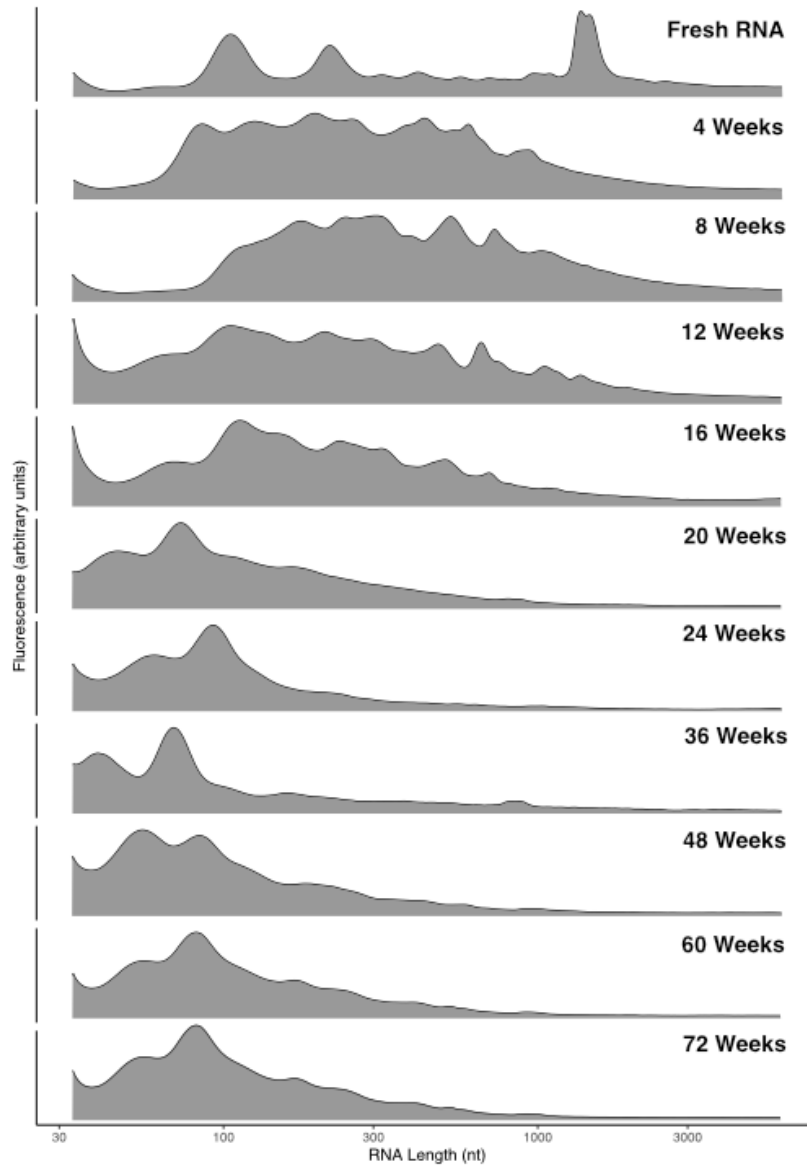

6

7 **Supplemental Figure 1: RNA grew increasingly fragmented in experimentally dried flies.**

8 The RNA length of representative sample from each time point of dried *D. melanogaster* are

9 shown. An Agilent Tapestation was used to measure RNA length distributions. Lengths <33 nt,

10 corresponding to the Tapestation lower marker internal control, are not plotted.

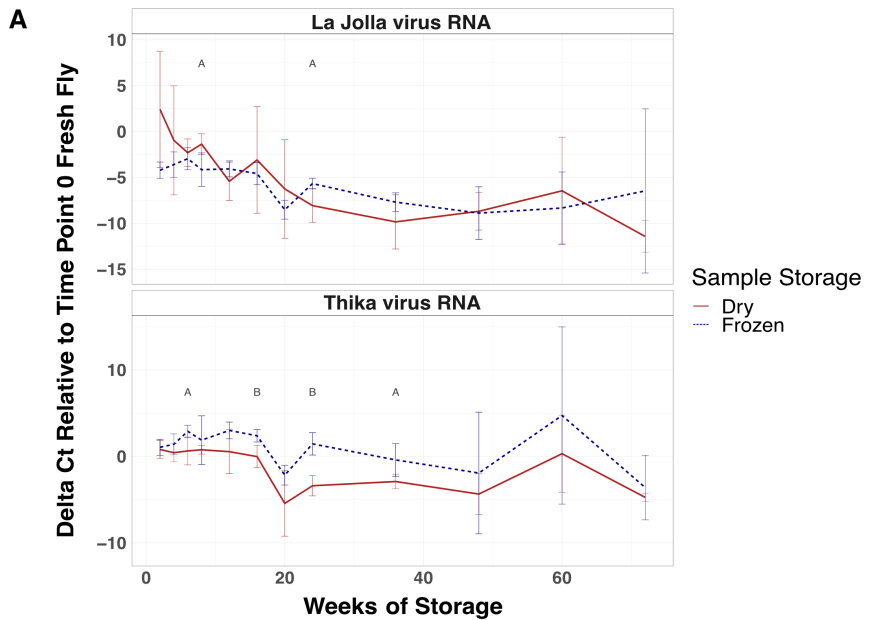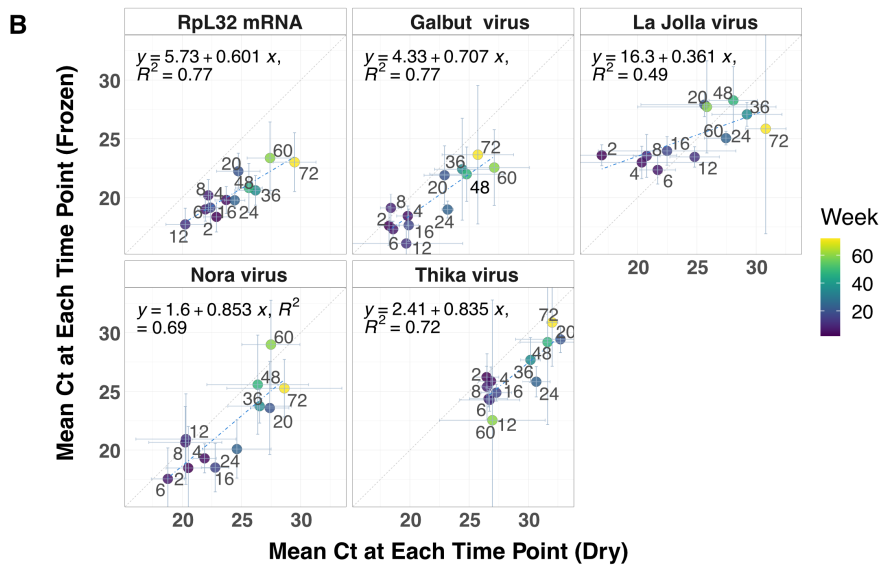

11

12 **Supplementary Figure 2: Viral RNA and host mRNA persisted in fly specimens over 72**

13 **weeks.** (A) Average difference between La Jolla virus and Thika virus RNA levels relative to

14 levels in fresh *D. melanogaster*. A two-tailed t-test was used to determine the statistical

15 significance between dried and frozen means at every time point (A < 0.05, B < 0.001). (B)

16 Comparison of mean Ct values at each time point for each RNA target. Linear regression lines

17 are shown as is the diagonal. Error bars represent mean plus and minus the standard deviation.

18 N = 3 male and 3 female at each time point.

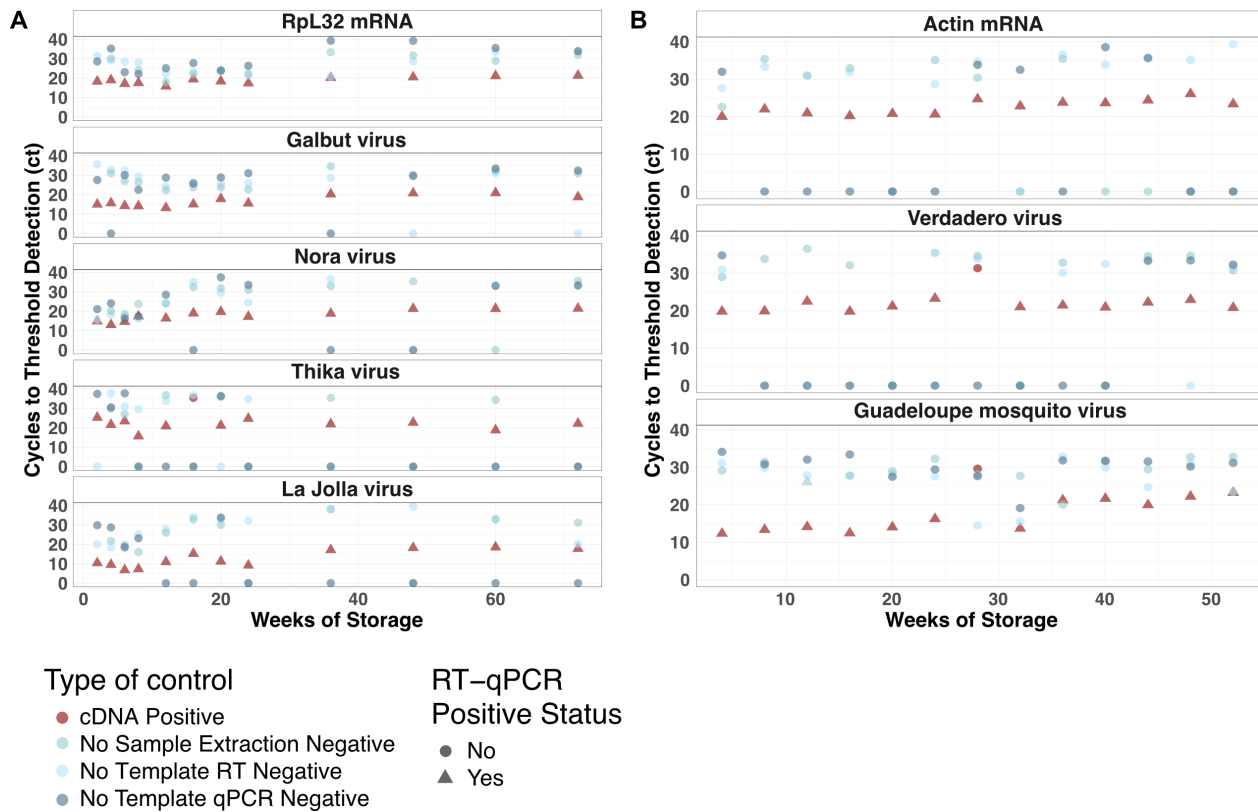

19

20

21 **Supplemental Figure 3: Positive and negative controls in experimentally dried flies and**  
 22 **mosquitoes showed no evidence of cross-contamination at extraction or RT-qPCR steps.**

23 Detection and threshold cycle for the indicated RNA targets are shown for experimentally dried  
 24 and frozen flies (A) and mosquitoes (B). One positive and 3 negative controls were used at each  
 25 time point: a cDNA positive control, a no-sample extraction blank control, a no-template RT  
 26 control, and a no-sample qPCR control. Positive calls required the sample's melting  
 27 temperature to be within one degree of the cDNA positive control's. Undetermined Cts (no  
 28 amplification) were set to zero. Samples from negative control samples with called Cts (likely  
 29 from primer dimer products) were confirmed negative by analysis of product melting  
 30 temperatures and agarose gel electrophoresis. Color indicates control type and symbols  
 31 indicate whether samples were called positive or negative.

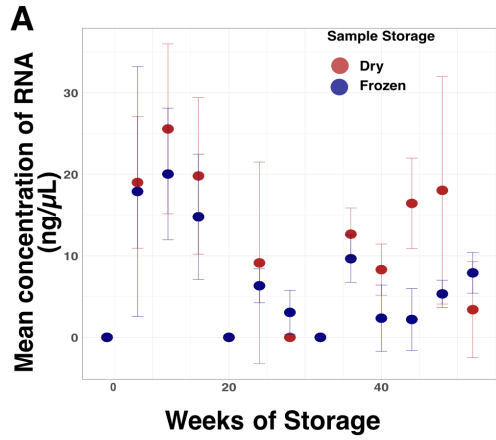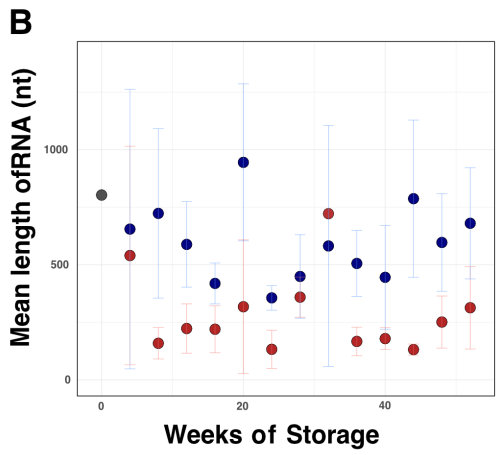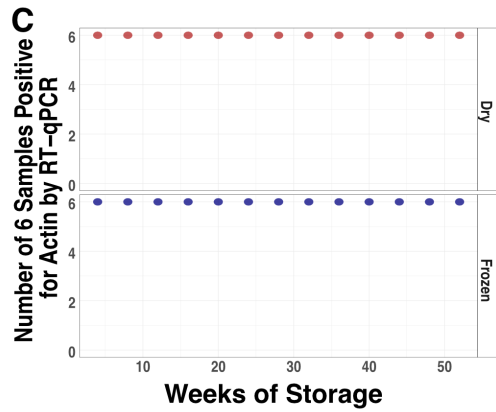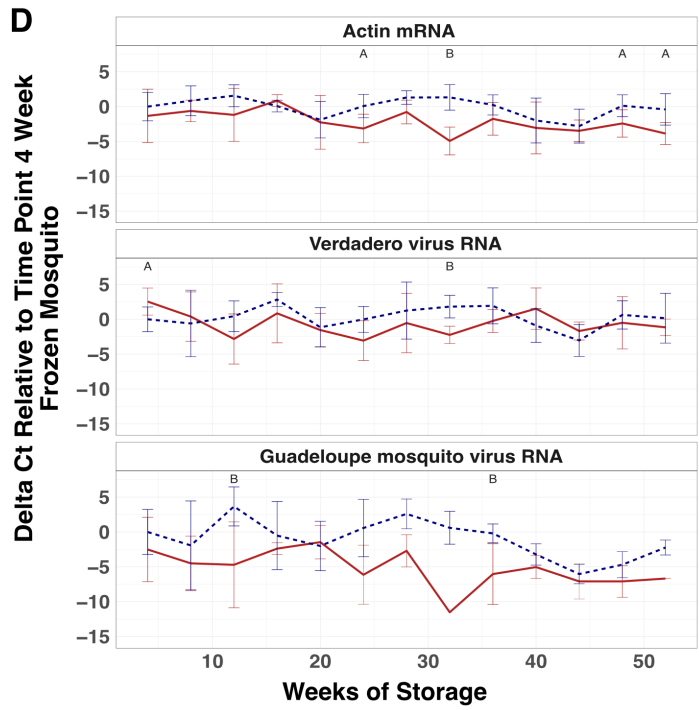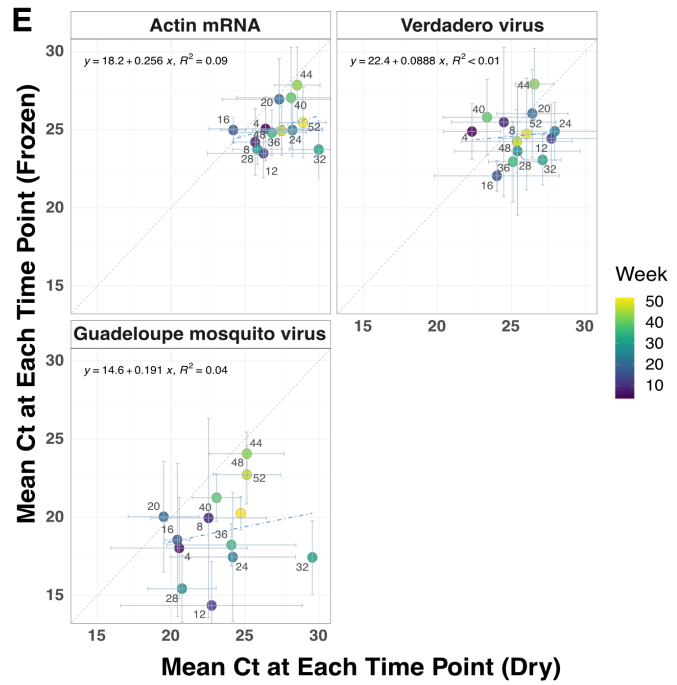

33 **Supplemental Figure 4: Viral RNA and host mRNA persisted in dried mosquito**  
34 **specimens over 52 weeks.** (A) Average RNA concentration and (B) RNA length of RNA from  
35 dried and frozen mosquitoes over 52 weeks. N = 3 female dried or frozen *Ae. aegypti* at each  
36 time. (C) Number of samples positive of 3 males and 3 females for actin mRNA via RT-qPCR in  
37 dried and frozen specimens over 52 weeks. (D) Average difference of actin mRNA, verdadero  
38 virus and Guadeloupe mosquito virus RNA levels relative to time point 4 weeks frozen *Ae.*  
39 *aegypti*. A two-tailed t-test was used to determine the statistical significance between dried and  
40 frozen means at every time point ( $A < 0.05$ ,  $B < 0.001$ ). (E) Comparison of mean Ct values at  
41 each time point for each RNA target. Linear regression lines are shown as is the diagonal. Error  
42 bars represent mean plus and minus the standard deviation. N = 3 male and 3 female.

43

44

45

46

47

48

49

50

51

52

53

54

55



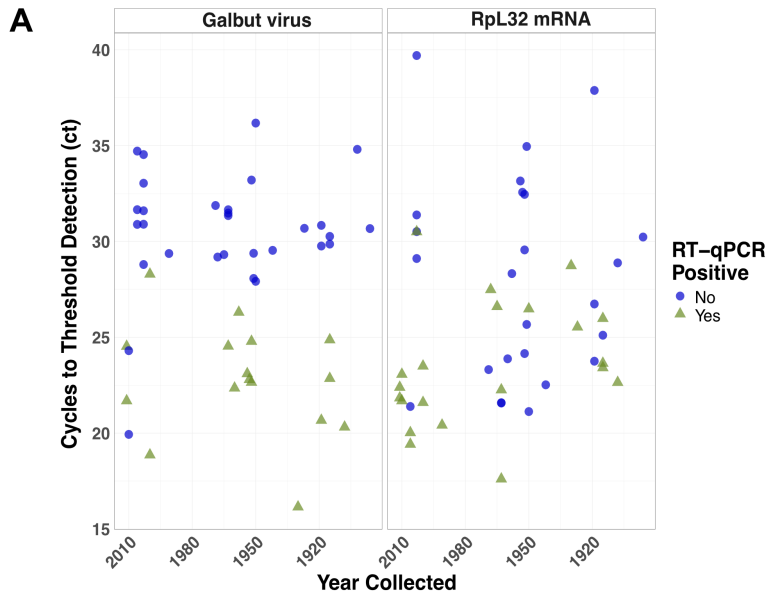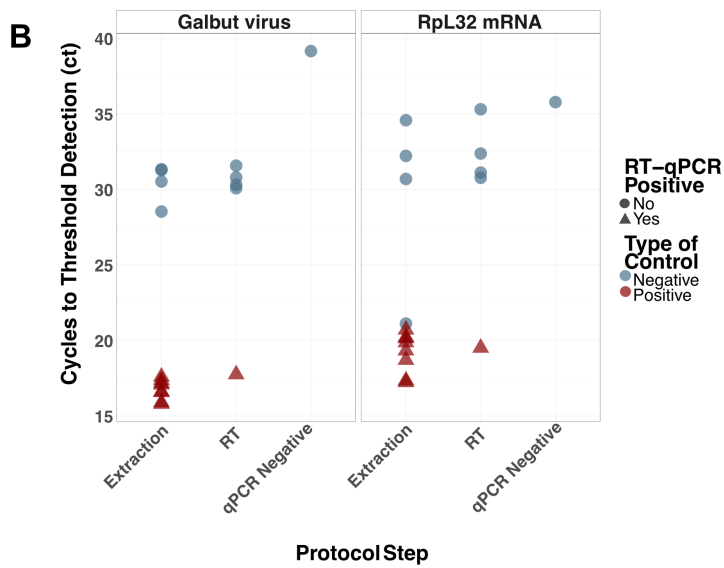

61

62 **Supplemental Figure 6: Screening of Museum specimens and controls for galbut virus**

63 **and RpL32 mRNA.** (A) RT-qPCR results for museum specimens and (B) controls screened for

64 galbut virus and RpL32 mRNA using short-range primers. Positive calls required that the

65 melting temperature be within one degree of the cDNA positive control and the presence of an

66 appropriately sized band on an agarose gel to distinguish legitimate positives from primer

67 dimers. Undetermined Cts were set to zero. Two extraction positive (fresh FoCo-17 fly) and one

68 negative (extraction blank) control was used for each set of extractions. Four RT no template

69 negative controls were also used to increase the chance of detecting contamination.



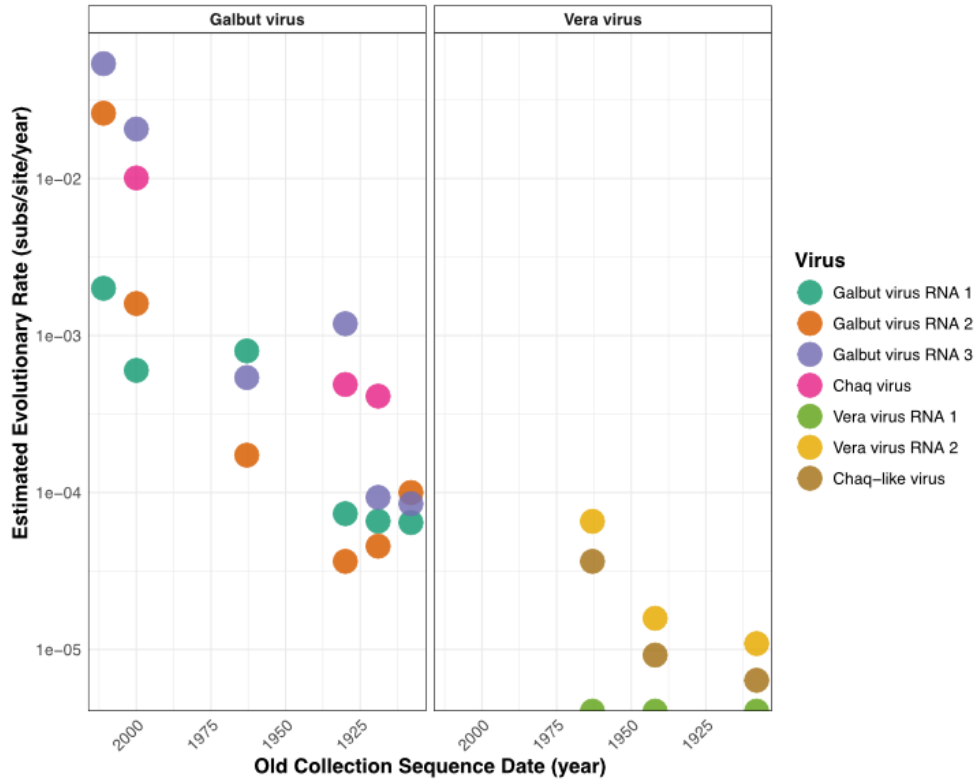

71

72

73 **Supplemental Figure 7: The estimated evolutionary rate of galbut virus and vera virus**  
 74 **from sequences recovered from museum specimens.** Rates were calculated as number of  
 75 substitutions per nucleotide per year relative to the most closely related sequence available in  
 76 GenBank with a known collection year. Samples without a suitably close contemporary  
 77 sequence were removed from this analysis. Color indicates virus. Vera virus RNA 1 sequences  
 78 are 100% identical to their closest available sequence.

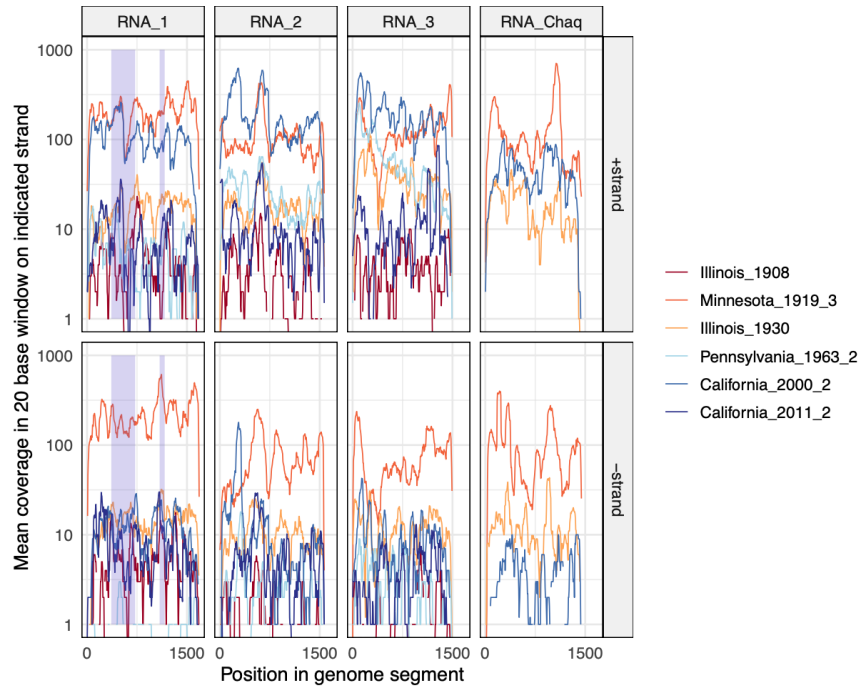

79

80 **Supplemental Figure 8: Galbut virus coverage derived from both strands of all segments.**  
 81 Coverage levels of +strand and –strand mapping reads across galbut virus segments are  
 82 plotted. The position of the long and short amplicons targeting RNA 1 are shaded in purple  
 83 **(Supplemental Table 2).**

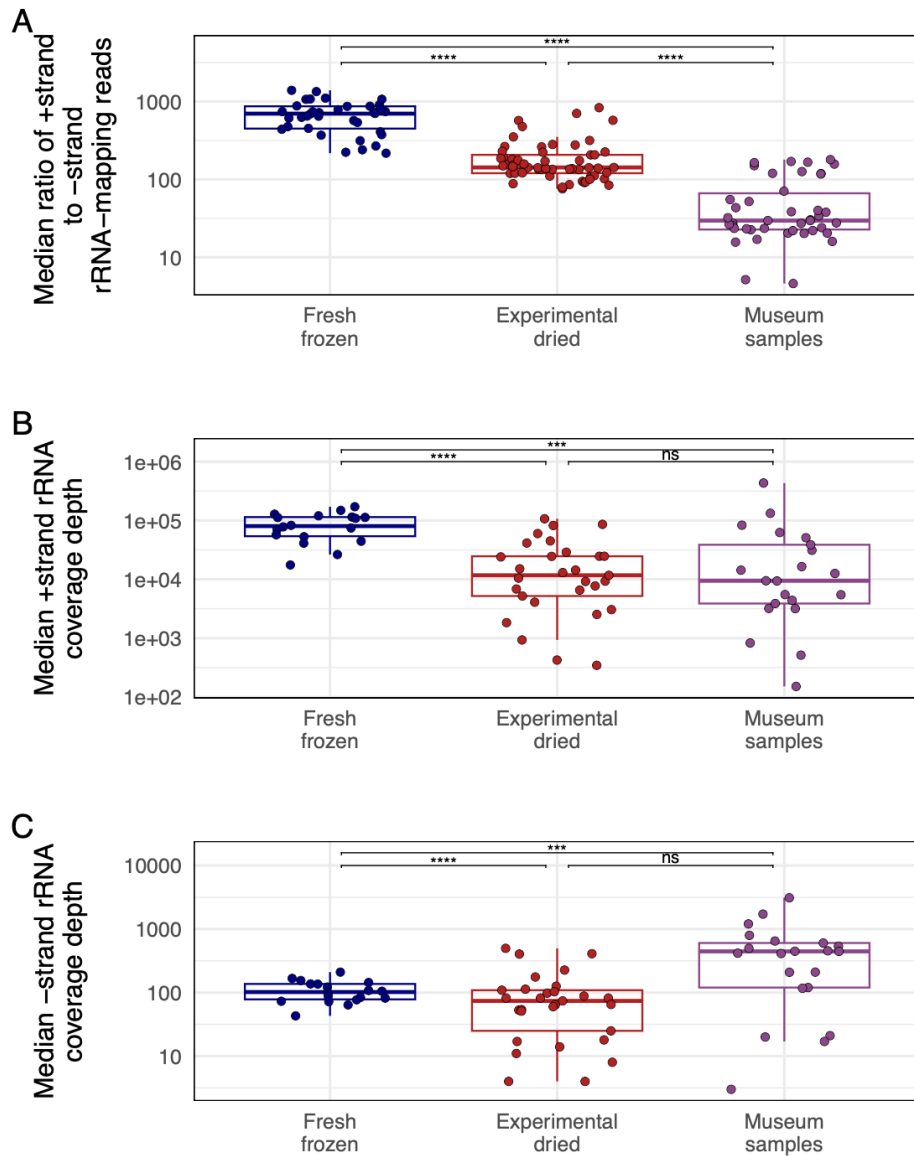

84

85 **Supplemental Figure 9: Strand ratios of surviving ribosomal RNA were consistent with**  
 86 **preferential survival of dsRNA in old samples.** (A) The ratio of +strand to -strand coverage

87 of rRNA-mapping reads in *D. melanogaster* datasets. Each point represents the median ratio

88 from individual-fly datasets. Adjusted *p*-values significance levels from Wilcoxon test are

89 indicated. (B) The depth of coverage of +strand rRNA-mapping reads. (C) The depth of

90 coverage of -strand rRNA mapping reads.

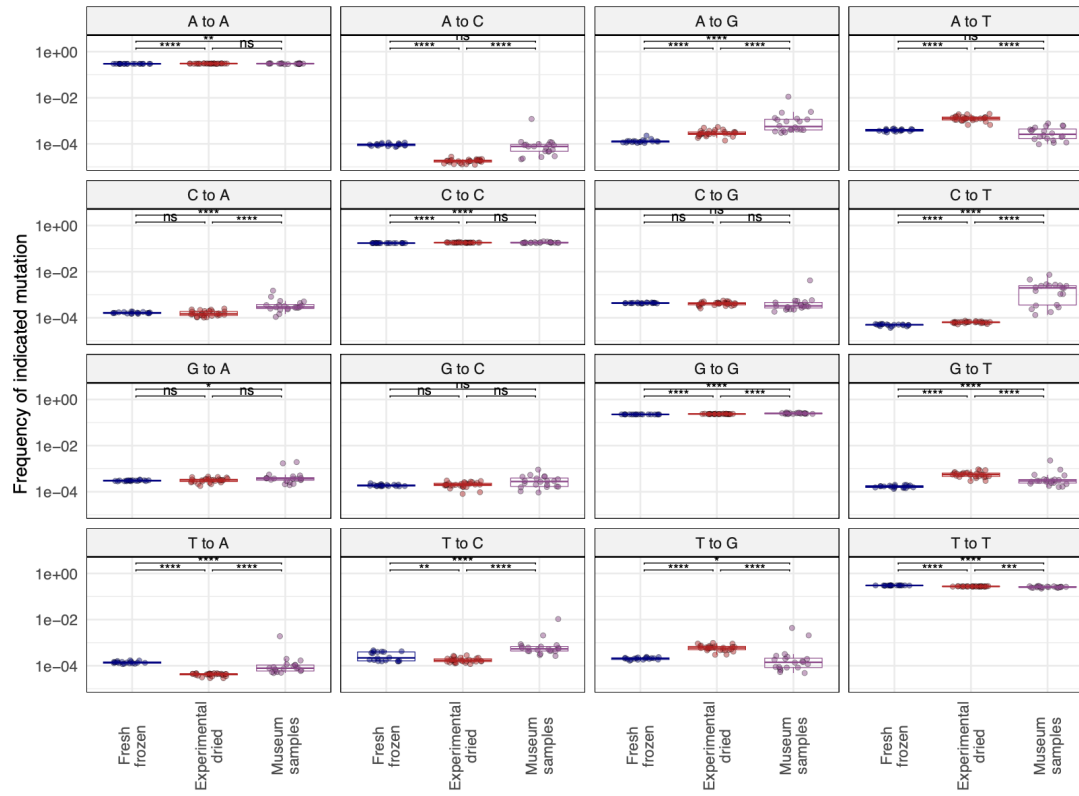

91

92 **Supplemental Figure 10: Old RNA was chemically damaged and exhibits mismatch**  
 93 **patterns consistent with cytosine and adenine deamination.** Mismatches in rRNA-mapping  
 94 reads from *D. melanogaster* datasets were quantified and the frequency of each mismatch type  
 95 is plotted. Each point represents a dataset from an individual fly. Adjusted *p*-values  
 96 significance levels from Wilcoxon test are indicated.

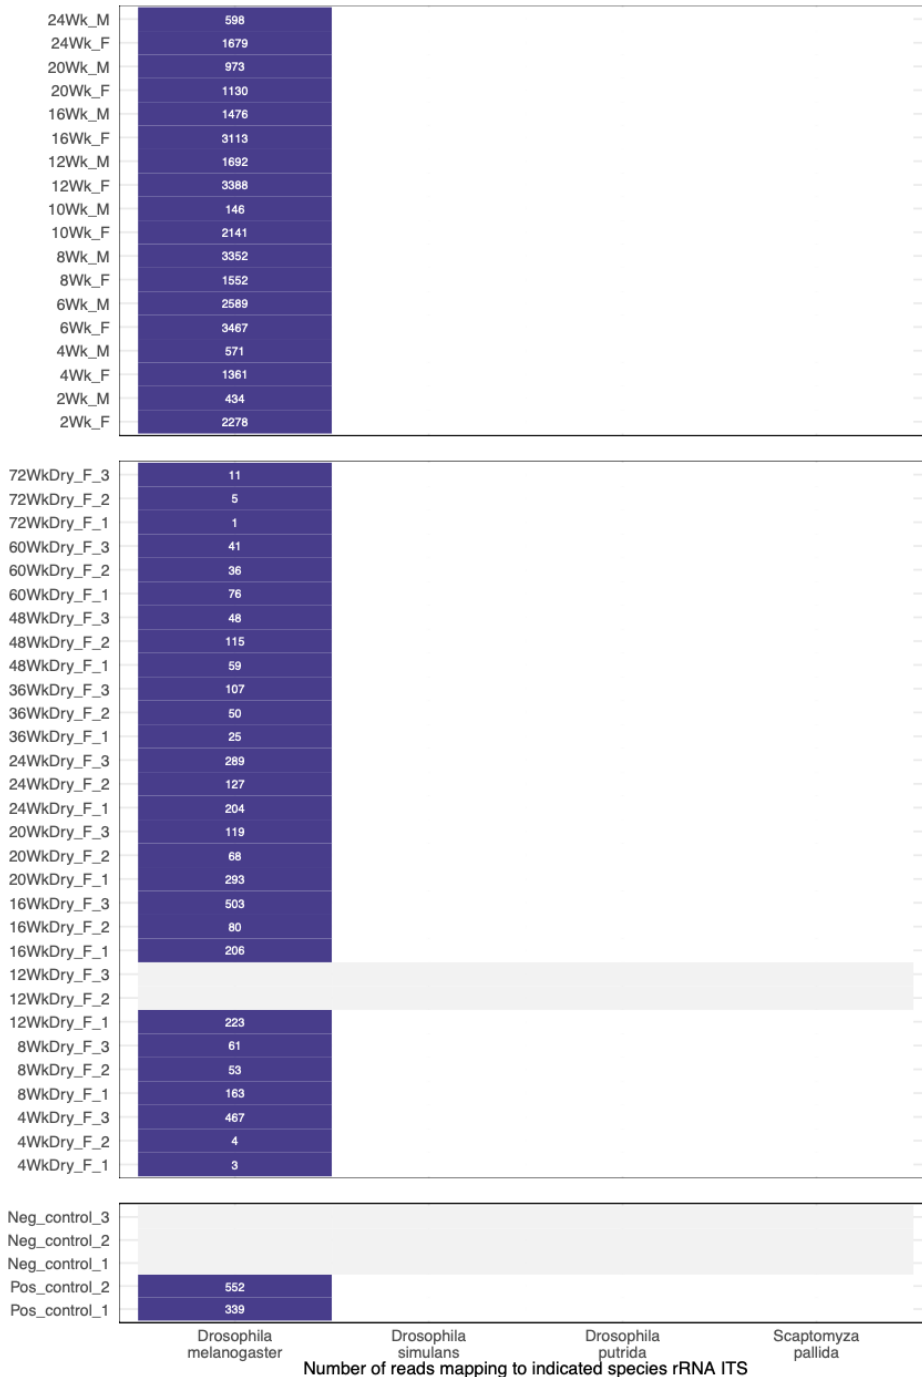

97

98 **Supplemental Figure 11: Host-mapping reads exhibited species specificity.** The number

99 of reads mapping to the indicated species rRNA internal transcribed spacer 1 (ITS) sequence

100 for each fresh-frozen, experimentally dried, or control dataset is shown. Datasets with no ITS-

101 mapping reads, including negative control water libraries, are represented with grey.
